# Supplementary material for: Patterned Arteriole-Scale Vessels Enhance Engraftment, Perfusion, and Vessel Branching Hierarchy of Engineered Human Myocardium for Heart Regeneration
Source: MDPI journal article supplement (doi:10.3390/cells12131698), 2023-06-23
Supplement: s1 [file s1]

| Antibody/Fluorophore                               | Dilution | Catalog No.; Vendor                   |
|----------------------------------------------------|----------|---------------------------------------|
| Mouse monoclonal anti- $\alpha$ sarcomeric actinin | 1:500    | A7811-.2ML;<br>MilliporeSigma         |
| Mouse monoclonal anti-cardiac troponin T           | 1:100    | MA5-12960 UL; Invitrogen              |
| Rabbit monoclonal anti-smooth muscle actin         | 1:150    | ab150301; Abcam                       |
| Mouse monoclonal anti-smooth muscle actin          | 1:150    | PIMA511547; Invitrogen                |
| Mouse monoclonal anti-human CD31                   | 1:100    | M082301-2; Agilent                    |
| Rabbit polyclonal anti-Myosin light chain 2v       | 1:100    | 10906-1-AP; ProteinTech               |
| Mouse monoclonal anti-Myosin light chain 2a        | 1:100    | 311 011; Synaptic Systems             |
| Rabbit polyclonal anti-cardiac troponin I          | 1:150    | ab47003; Abcam                        |
| Rabbit polyclonal anti-Connexin-43                 | 1:200    | C6219-100UL;<br>MilliporeSigma        |
| Rabbit monoclonal anti-human Ku80                  | 1:150    | 2180S; Cell Signaling<br>Technologies |

|                                                             |           |                                |
|-------------------------------------------------------------|-----------|--------------------------------|
| Bisbenzimidide H 33342<br>trihydrochloride (Hoechst)        | 1.5 µg/mL | B2261-100MG;<br>MilliporeSigma |
| Goat anti-mouse/rabbit Alexa Fluor<br>488                   | 1:300     | A-1100; A-11008;<br>Invitrogen |
| Goat anti-rabbit/mouse Alexa Fluor<br>594                   | 1:300     | A11012; A-11005;<br>Invitrogen |
| Griffonia simplicifolia isolectin-B4<br>Dylight 594-labeled | 1:200     | DL-1207-.5; Vector Labs        |
| Mouse anti-human Ki67 FITC-<br>labeled                      | 1:50      | 612472; BD Biosciences         |

**Table S1.** Antibodies used in immunohistochemical staining.

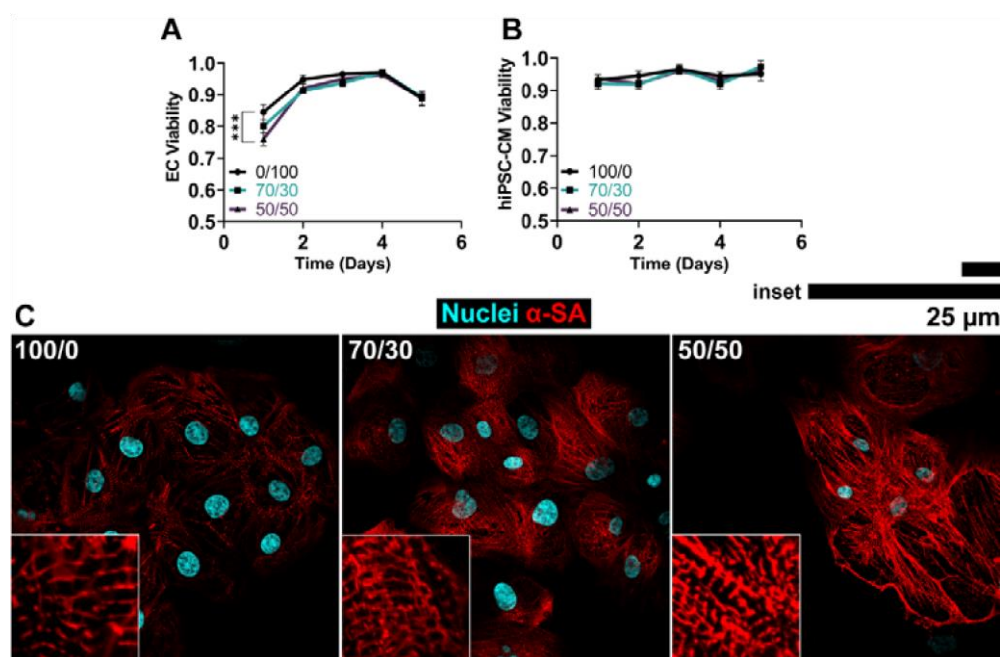

**Figure S1:** Cellular viability and morphology. (A) EC and (B) hiPSC-CM viability in response to culture in mixed media.  $n = 6-9$  per group. (C) Histological staining for  $\alpha$ -sarcomeric actinin in hiPSC-CMs.  $\alpha$ -SA:  $\alpha$ -sarcomeric

actinin. Mixed media formulations are indicated as percent B27/percent EGM-2 (e.g., 70/30: 70% B27 and 30% EGM-2). \*\*\*  $p < 0.001$ .

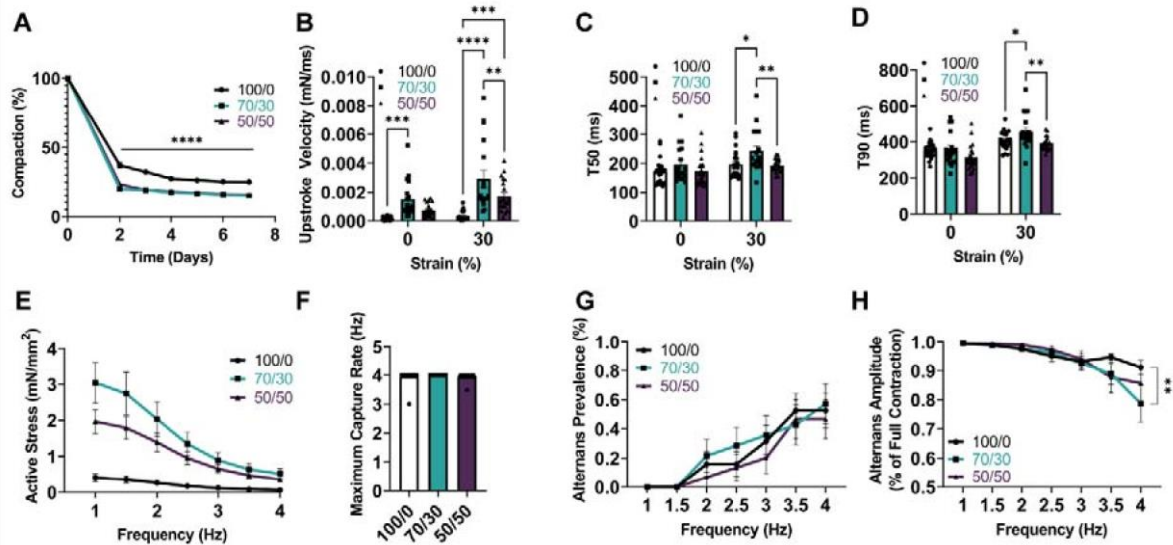

**Figure S2:** EHM compaction and contractile kinetics. (A) EHM compaction over one week of mixed media culture. EHM contractile kinetics of (B) upstroke velocity, time to (C) 50% and (D) 90% relaxation (T50 and T90), (E) force frequency response, and (F) maximum capture rate.  $n = 18-21$  per group. (G) Prevalence of contractile alternans and (H) relative amplitude of partial-force contractions observed during force-frequency response testing.  $n = 14-19$  per group. Mixed media formulations are indicated as percent B27/percent EGM-2 (e.g., 70/30: 70% B27 and 30% EGM-2). \*  $p < 0.05$ ; \*\*  $p < 0.01$ ; \*\*\*  $p < 0.001$ ; \*\*\*\*  $p < 0.0001$ .

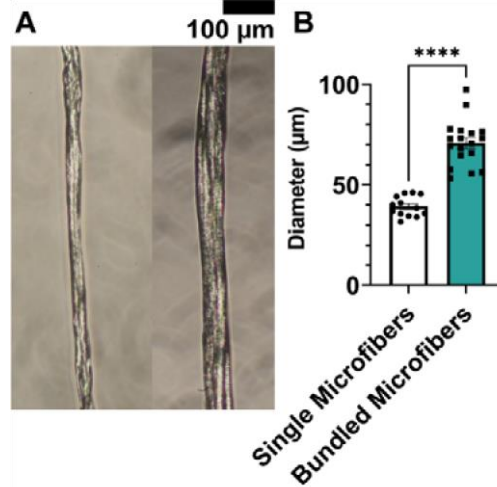

**Figure S3:** Wet spun collagen microfiber bundles. (A) Wet spun collagen microfibers are wrapped around themselves four times to create bundled fibers. (B) Collagen microfiber diameter compared to individual microfibers.  $n = 16-18$  per group. \*\*\*\*  $p < 0.0001$ .

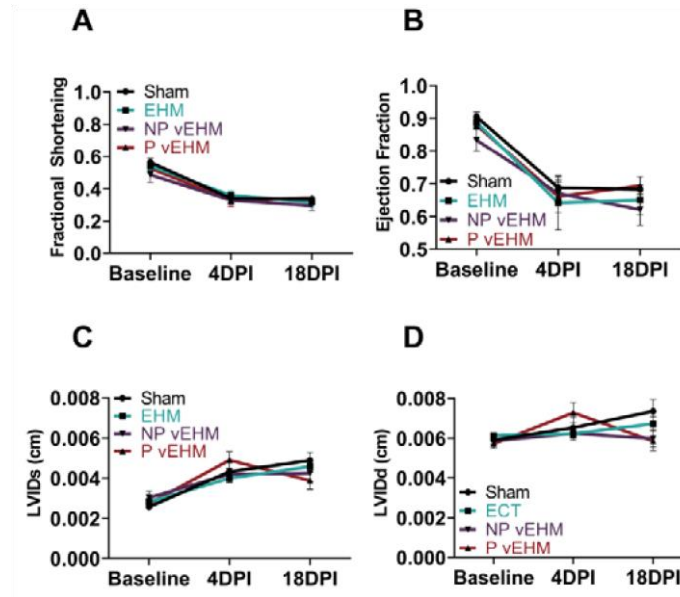

**Figure S4:** Echocardiographic metrics of heart function. (A) Measurements of fractional shortening, (B) ejection fraction, and left ventricular inner diameter in (C) systole (LVIDs) and (D) diastole (LVIDd).  $n = 4-6$  per group.

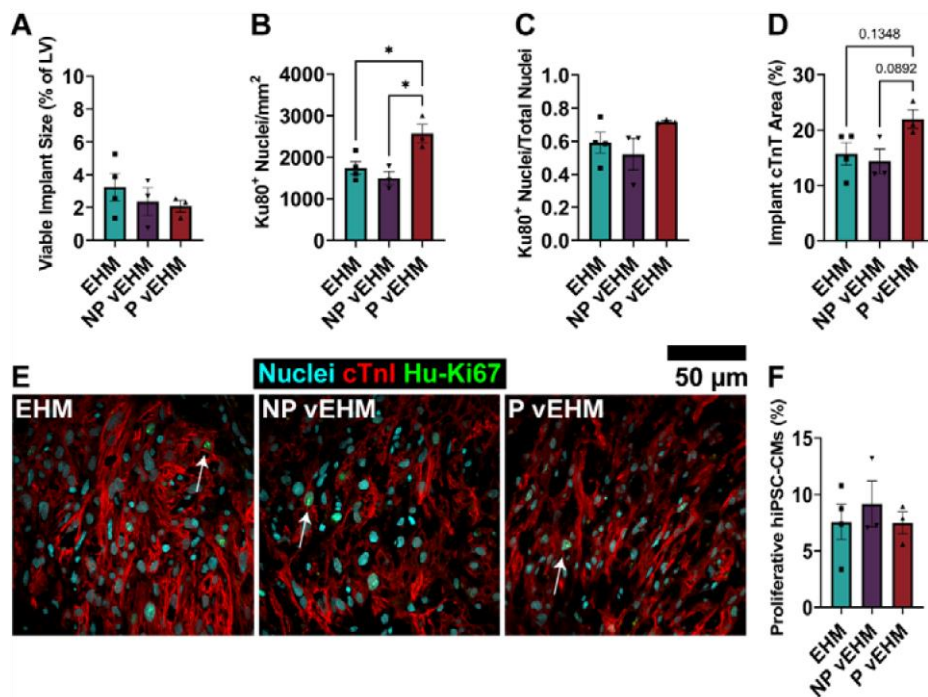

**Figure S5:** Characterization of human cells in implants. (A) Viable implant size relative to LV size. (B) Density of human cells in implants by Hu-Ku80<sup>+</sup> staining. (C) Ratio of Hu-Ku80<sup>+</sup> to total nuclei. (D) Measurement of cTnT

area in implants. (E, F) Proliferation assessment of implanted hiPSC-CMs by staining for Hu- Ki67 (white arrows) and cTnI.  $n = 3-4$  per group. cTnT: cardiac troponin T; Hu-Ki67: Human-specific Ki67. \*  $p < 0.05$ .

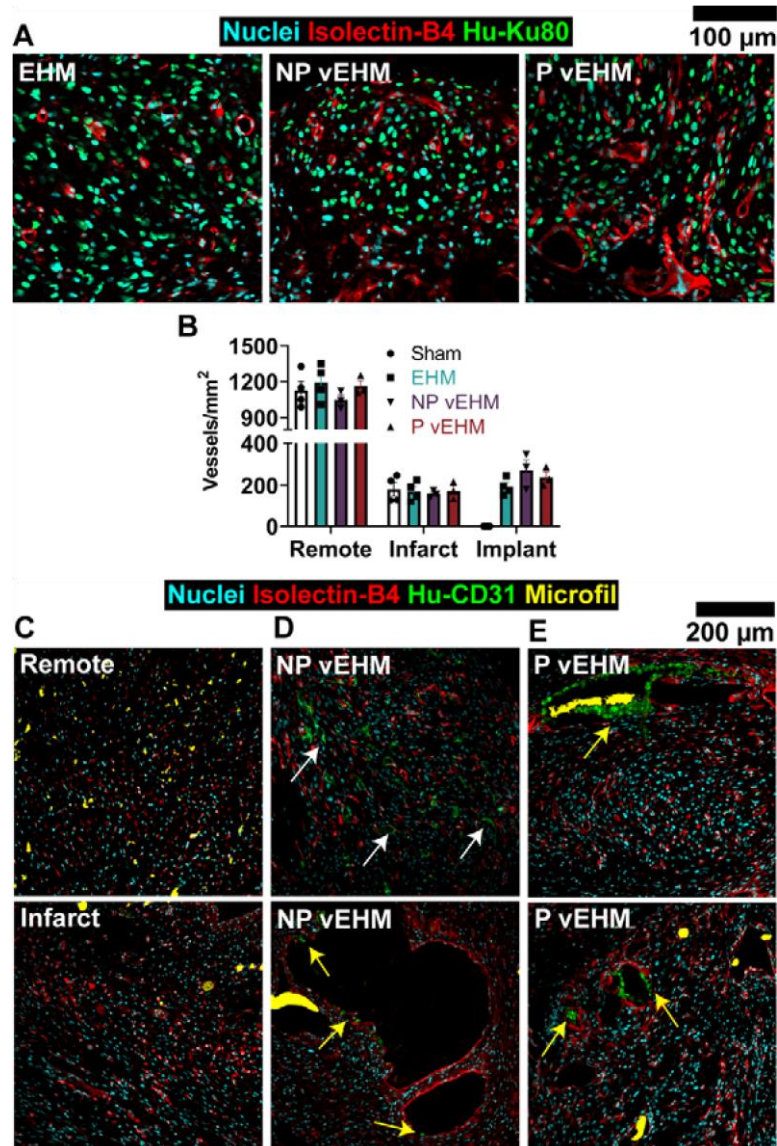

**Figure S6:** Implant vascularization and human vascular morphology. (A) Representative images of vessel morphology in implants. (B) Quantification of number of vessels across remote, infarct, and implants regions.  $n = 3-4$  per group. (C) Representative vascular stains of the remote and infarct regions of sham hearts. (D) Human ECs in NP vEHMs appear as isolated capillary sprouts (white arrows) or as part of larger, host-lined vessels (yellow arrows). (E) Human ECs in P vEHMs are only found in chimeric vessels (yellow arrows). Hu-Ku80: Human-specific Ku80; HuCD31: Human-specific CD31.



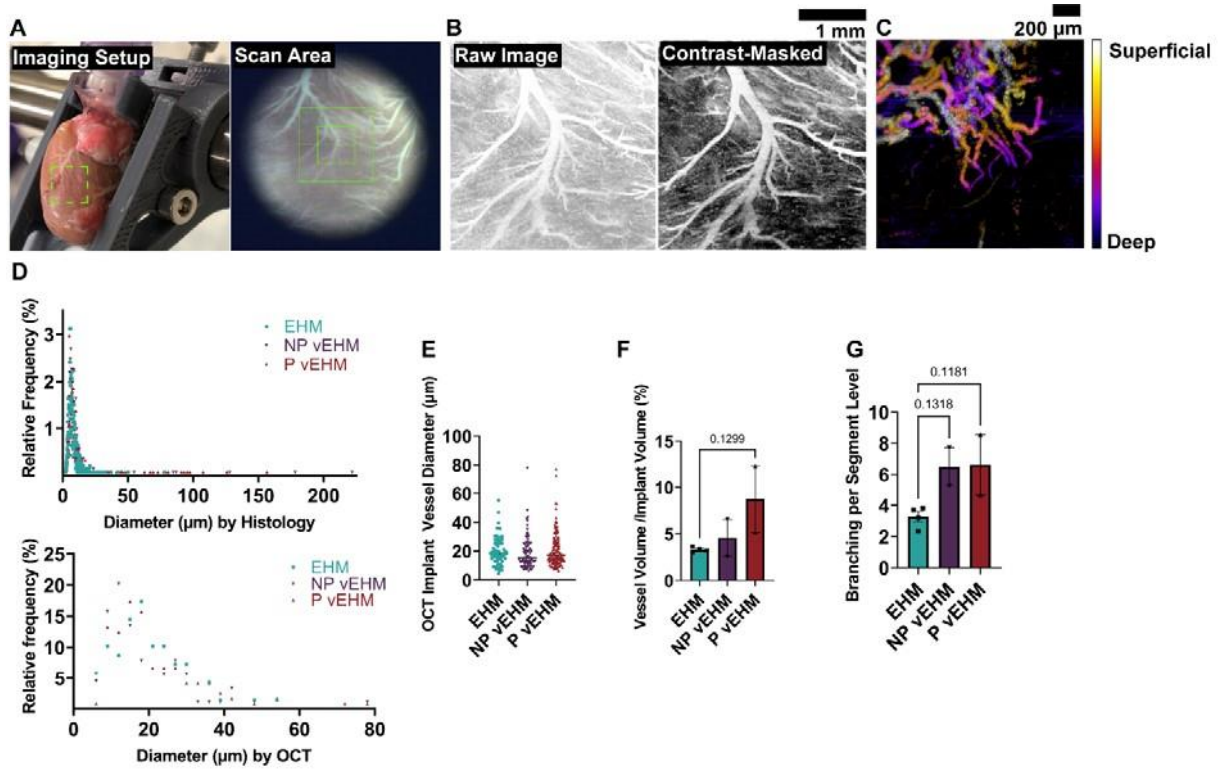

**Figure S7:** Perfusion quantification by OCT and microCT. **(A)** OCT imaging setup during intralipid perfusion and example scan area (green dotted square) with 5x objective. **(B)** Corresponding preview image after acquisition and final image after contrast-mask averaging of multiple volumes. **(C)** False-colored image of implant vasculature demonstrating vessel depth. **(D)** Comparison of vessel diameters as measured by histological analysis and **(E)** OCT. MicroCT analysis of **(F)** intra-implant vascular volume and **(G)** branching per segment level.  $n = 2-3$  per group. OCT: Optical Coherence Tomography.

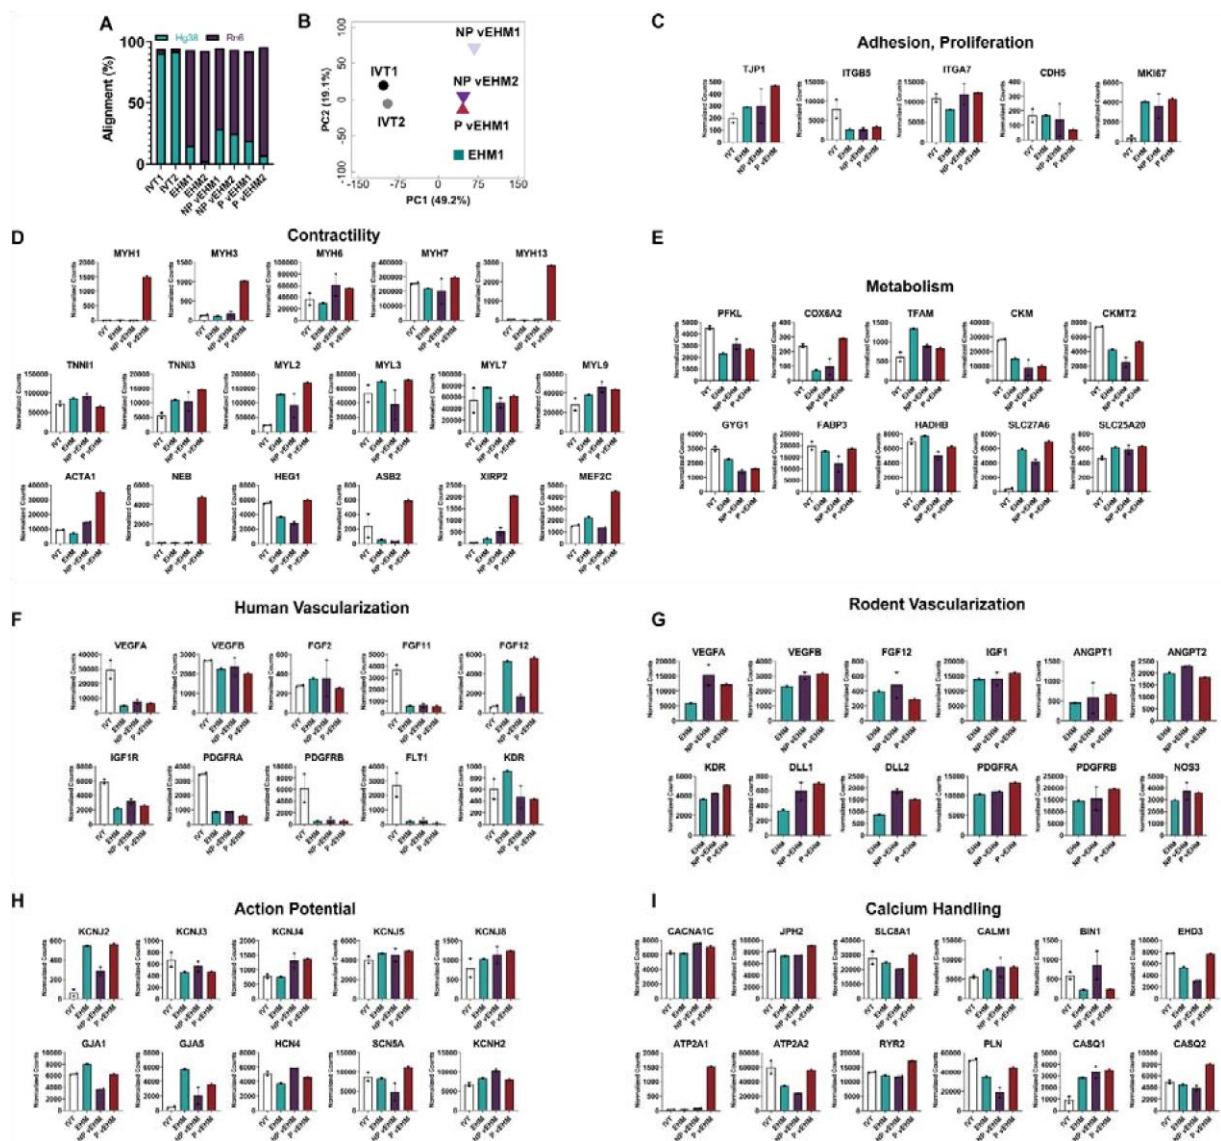

**Figure S8:** Exploratory bulk RNA sequencing of explanted EHMs. **(A)** Alignment of sequenced samples to hg38 (human) and rn6 (rat) genomes. **(B)** Principal component analysis of human-aligned samples. **(C-I)** Comparison of gene regulation across categories of cardiomyocyte and vascular development.  $n = 1-2$  per group.

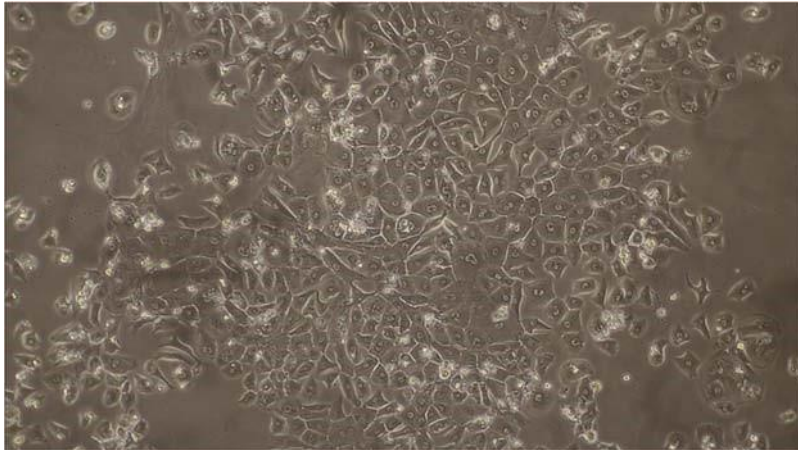

**Suppl. Video S1:** hiPSC-CMs at day 30 after expansion and lactate selection.

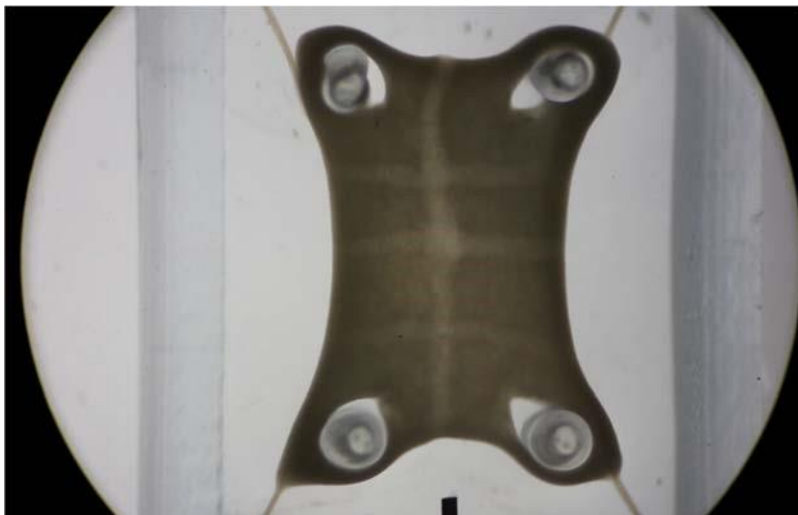

**Suppl. Video S2:** EHM at day 5 prior to implantation.



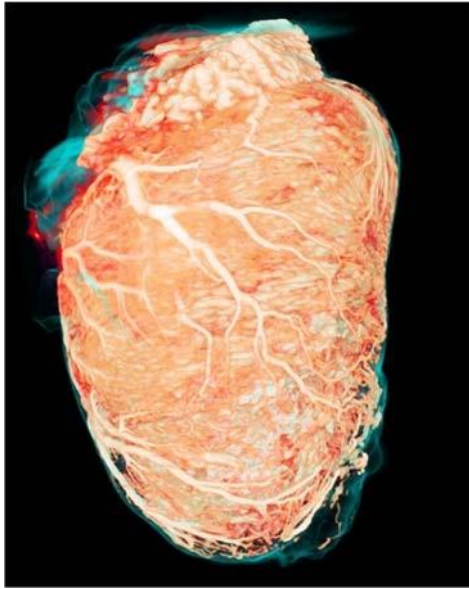

**Suppl. Video S3:** Vascular reconstruction of microCT-scanned heart with representative EHM implant.

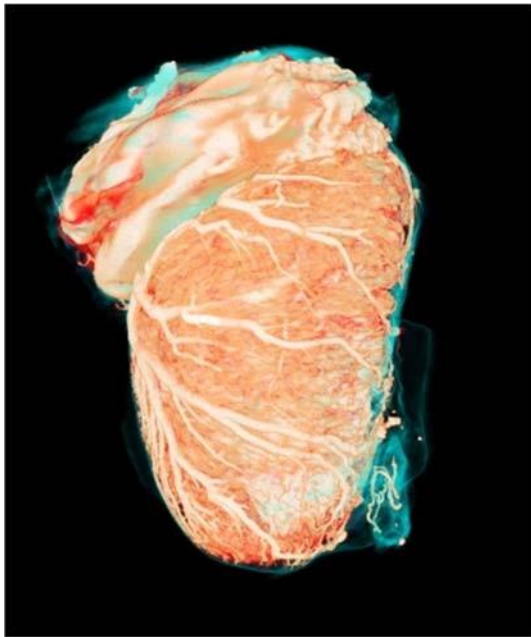

**Suppl. Video S4:** Vascular reconstruction of microCT-scanned heart with representative NP vEHM implant.

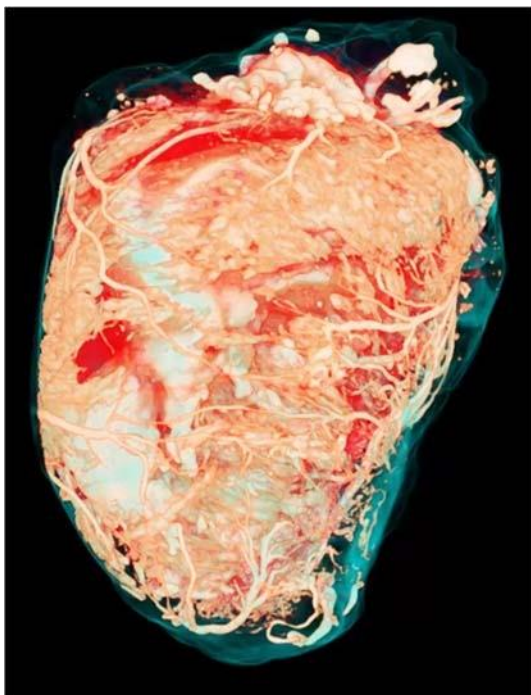

**Suppl. Video S5:** Vascular reconstruction of microCT-scanned heart with representative P vEHM implant.
