# Supplementary material for: Patterned Arteriole-Scale Vessels Enhance Engraftment, Perfusion, and Vessel Branching Hierarchy of Engineered Human Myocardium for Heart Regeneration
Source: Cells. 2023 Jun 23;12(13):1698. doi: 10.3390/cells12131698 (PMC10340601; doi:10.3390/cells12131698)
Supplement: Supplementary file 1 [file cells-12-01698-s001.zip]

Archive with 27 entries (27 files):
- cells-2421724-supplementary.pdf
- SupplFig1.tif
- SupplFig2v2.tif
- SupplFig3v2.tif
- SupplFig4.tif
- SupplFig5v4.tif
- SupplFig6V2.tif
- SupplFig7v2.tif
- SupplFig8.tif
- SupplMov1.mov
- SupplMov2.mov
- SupplMov3.mp4
- SupplMov4.mp4
- SupplMov5.mp4
- __MACOSX/._SupplFig1.tif
- __MACOSX/._SupplFig2v2.tif
- __MACOSX/._SupplFig3v2.tif
- __MACOSX/._SupplFig4.tif
- __MACOSX/._SupplFig5v4.tif
- __MACOSX/._SupplFig6V2.tif
- __MACOSX/._SupplFig7v2.tif
- __MACOSX/._SupplFig8.tif
- __MACOSX/._SupplMov1.mov
- __MACOSX/._SupplMov2.mov
- __MACOSX/._SupplMov3.mp4
- __MACOSX/._SupplMov4.mp4
- __MACOSX/._SupplMov5.mp4
